# Supplementary material for: Integrated FT-ICR MS and metabolome reveals diatom-derived organic matter by bacterial transformation under warming and acidification
Source: PubMed Central journal article supplement — iScience. 2023 May 4;26(6):106812. doi: 10.1016/j.isci.2023.106812 (PMC10197009; doi:10.1016/j.isci.2023.106812), 2023-05-04
Supplement: mmc1.pdf [file mmc1.pdf]

iScience, Volume 26

**Supplemental information**

**Integrated FT-ICR MS and metabolome reveals  
diatom-derived organic matter by bacterial  
transformation under warming and acidification**

**Yang Liu, Chao Ma, and Jun Sun**

**Journal: *iScience***

Supplementary Information for

**Integrated FT-ICR MS and metabolome analysis reveals  
diatom-derived organic matter by bacterial transformation  
under warming and acidification**

Yang Liu<sup>1, 2, 3</sup>, Chao Ma<sup>4</sup>, Jun Sun<sup>1, 2\*</sup>

<sup>1</sup> Institute for Advance Marine Research, China University of Geosciences,  
Guangzhou 511462, China.

<sup>2</sup> State Key Laboratory of Biogeology and Environmental Geology, China University  
of Geosciences, Wuhan 430074, China.

<sup>3</sup> Institute of Marine Science and Technology, Shandong University, Qingdao 266237,  
China.

<sup>4</sup> Institute of Surface-Earth System Science, School of Earth System Science, Tianjin  
University, Tianjin 300072, China.

\* Corresponding author: Jun Sun ([phytoplankton@163.com](mailto:phytoplankton@163.com))

**Contents of this file:**

- **Figures: 13**
- **Tables: 6**

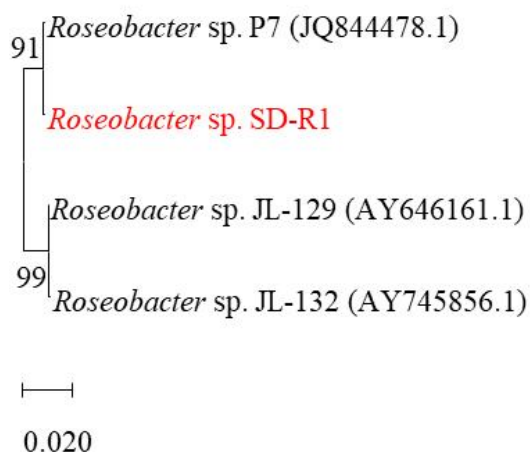

**Figure S1. The phylogenetic tree of the isolated bacteria (*Roseobacter* sp. SD-R1) based on NJ analysis of the 16S rRNA gene.**

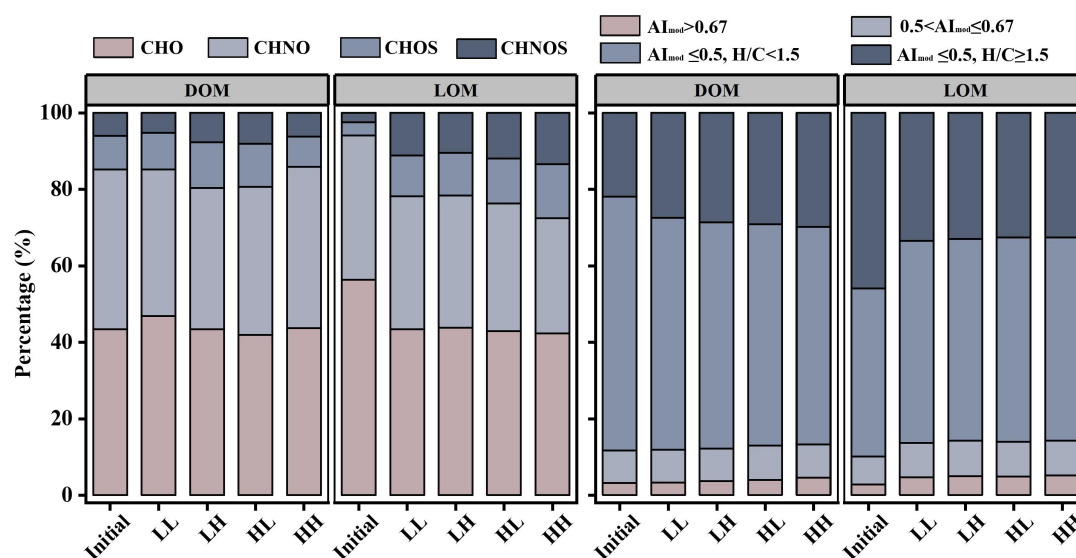

**Figure S2. Properties of the assigned features in diatom-derived DOM and LOM under warming and acidification:** Compound classes (including CHO, CHNO, CHOS, and CHNOS). Proportional distributions of polycyclic aromatic compounds (AI<sub>mod</sub> > 0.67), aromatic compounds (0.5 < AI<sub>mod</sub> ≤ 0.67), highly unsaturated and phenolic compounds (AI<sub>mod</sub> ≤ 0.5 and H/C < 1.5), and aliphatic compounds (AI<sub>mod</sub> ≤ 0.5 and H/C ≥ 1.5).

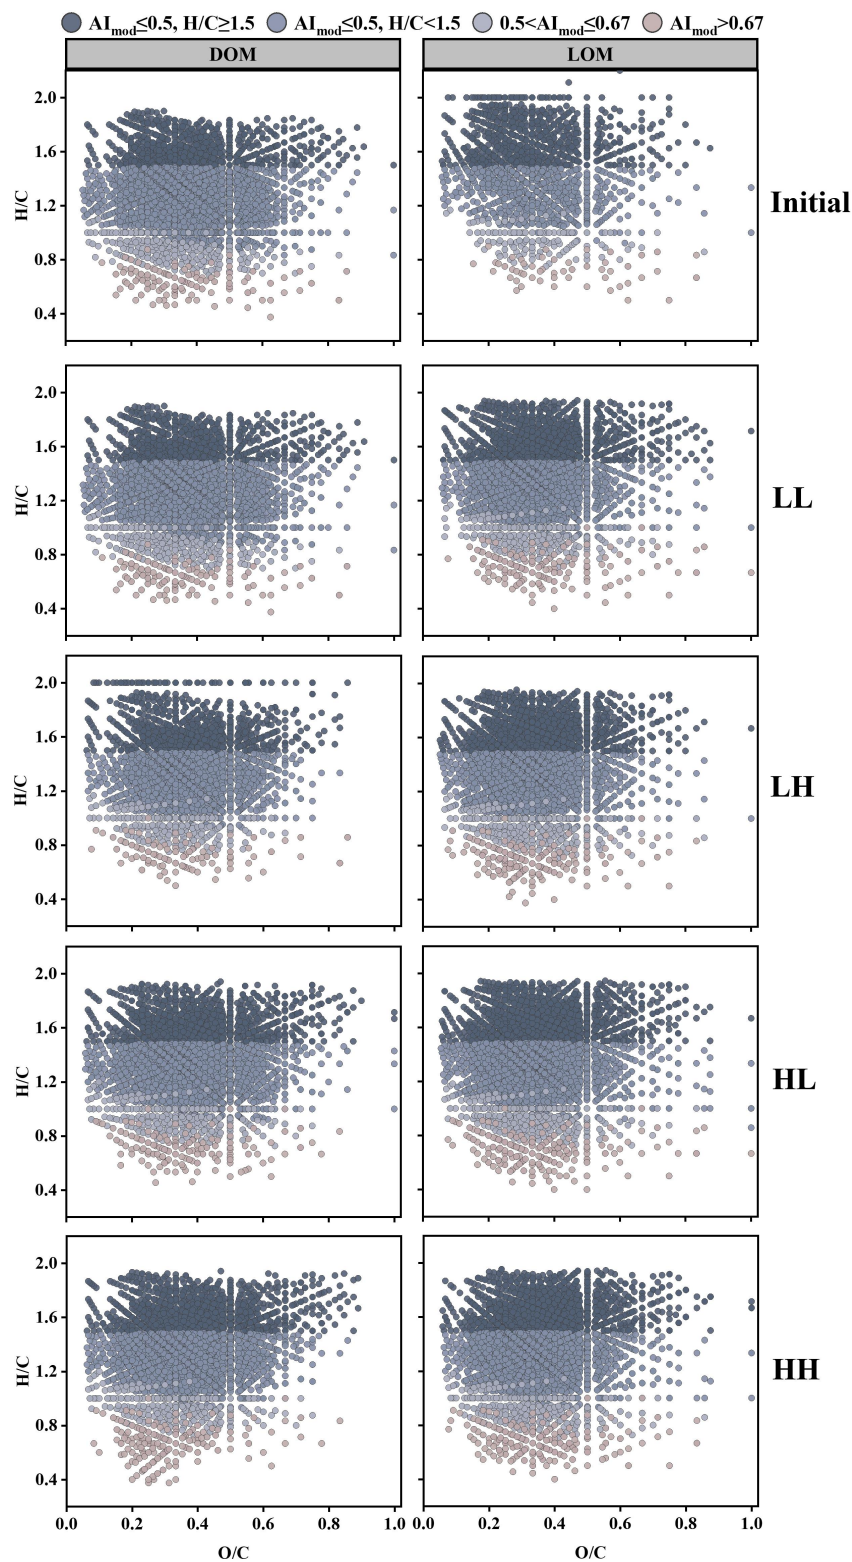

**Figure S3. Classification of OM molecular functional groups by modified aromaticity index.** Highly unsaturated and phenolic compounds ( $AI_{mod} \leq 0.5$  and  $H/C < 1.5$ ), aliphatic compounds ( $AI_{mod} \leq 0.5$  and  $H/C \geq 1.5$ ), aromatic compounds ( $0.5 < AI_{mod} \leq 0.67$ ), and polycyclic aromatic compounds ( $AI_{mod} > 0.67$ ).

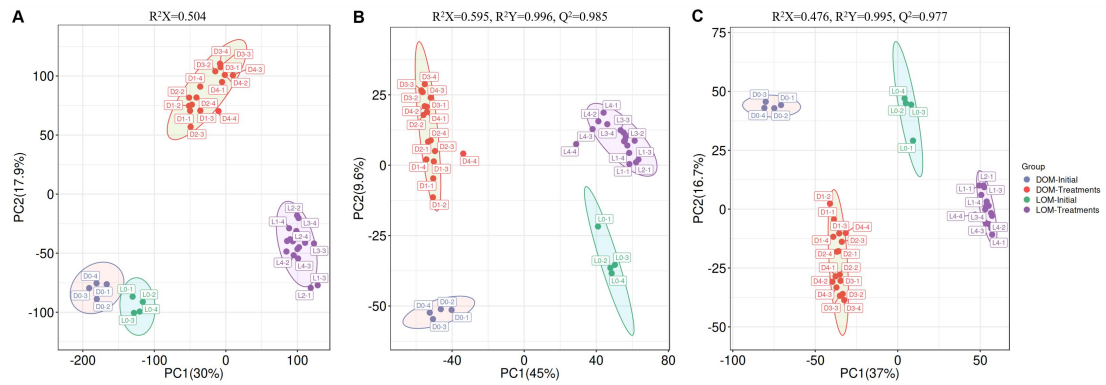

**Figure S4.** The score plots of principal component analysis (A), partial least squares discriminate analysis (B), and orthogonal projections to latent structures discriminant analysis (C) from the metabolite profiles. Different colors represent different groups and each point represents a sample. Comparing the DOM treatments and LOM treatments, including D1 and L1 (LL), D2 and L2 (LH), D3 and L3 (HL), and D4 and L4 (HH) treatments. Four biological replicates per group.

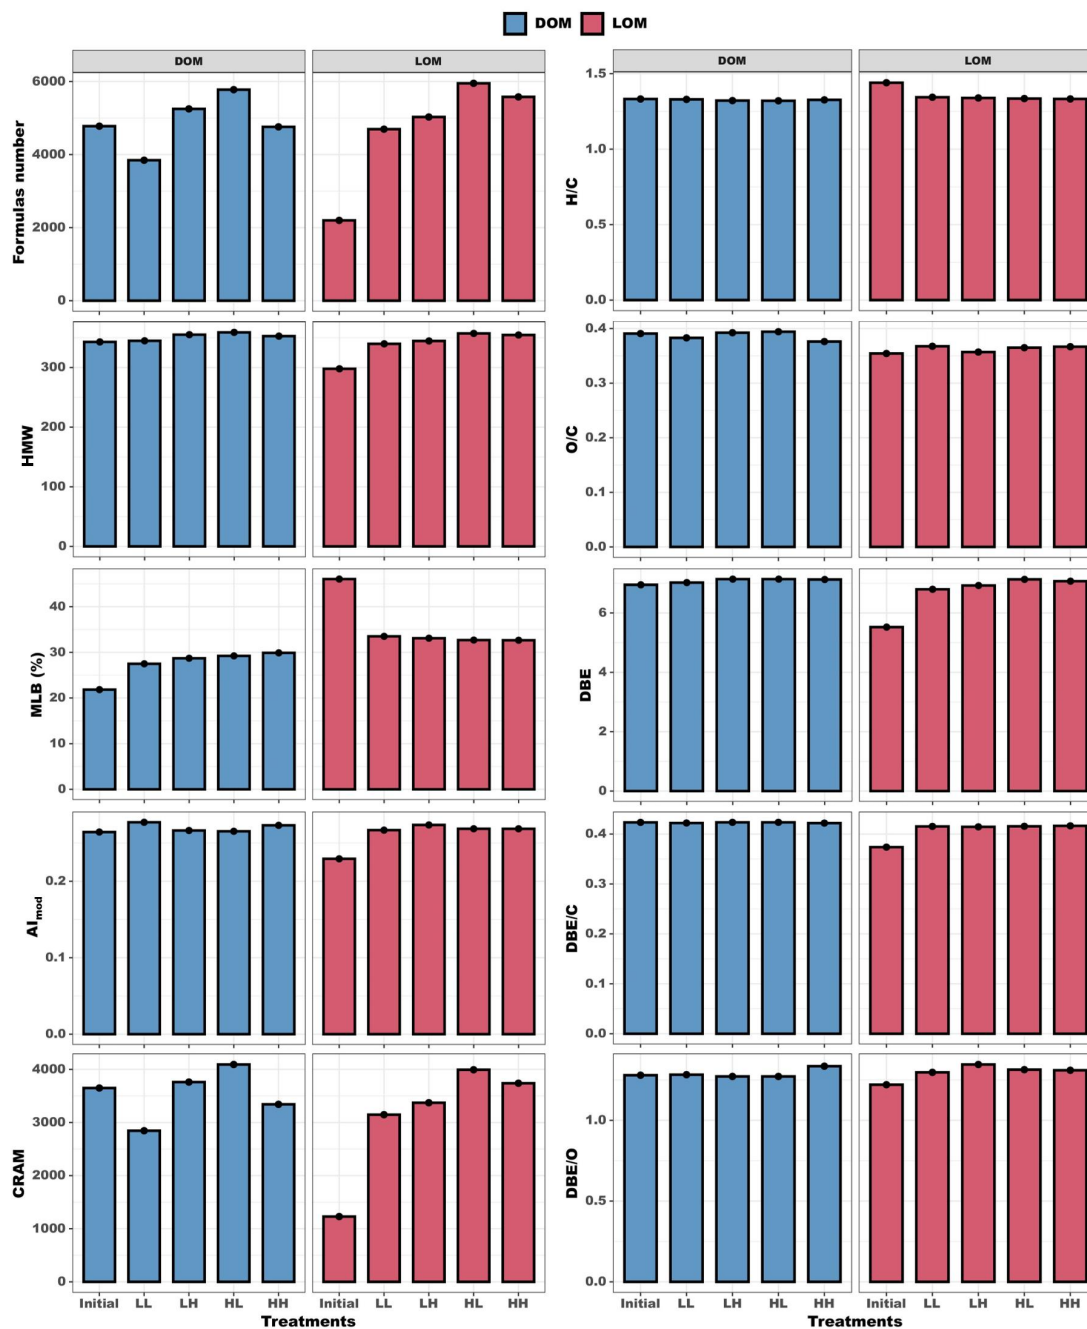

**Figure S5. Properties of the assigned features in diatom-derived DOM and LOM under warming and acidification: number of formulas; high molecular weight (HMW); MLB (%); AI<sub>mod</sub>; CRAM; H/C; O/C; DBE; DBE/C; DBE/O.**

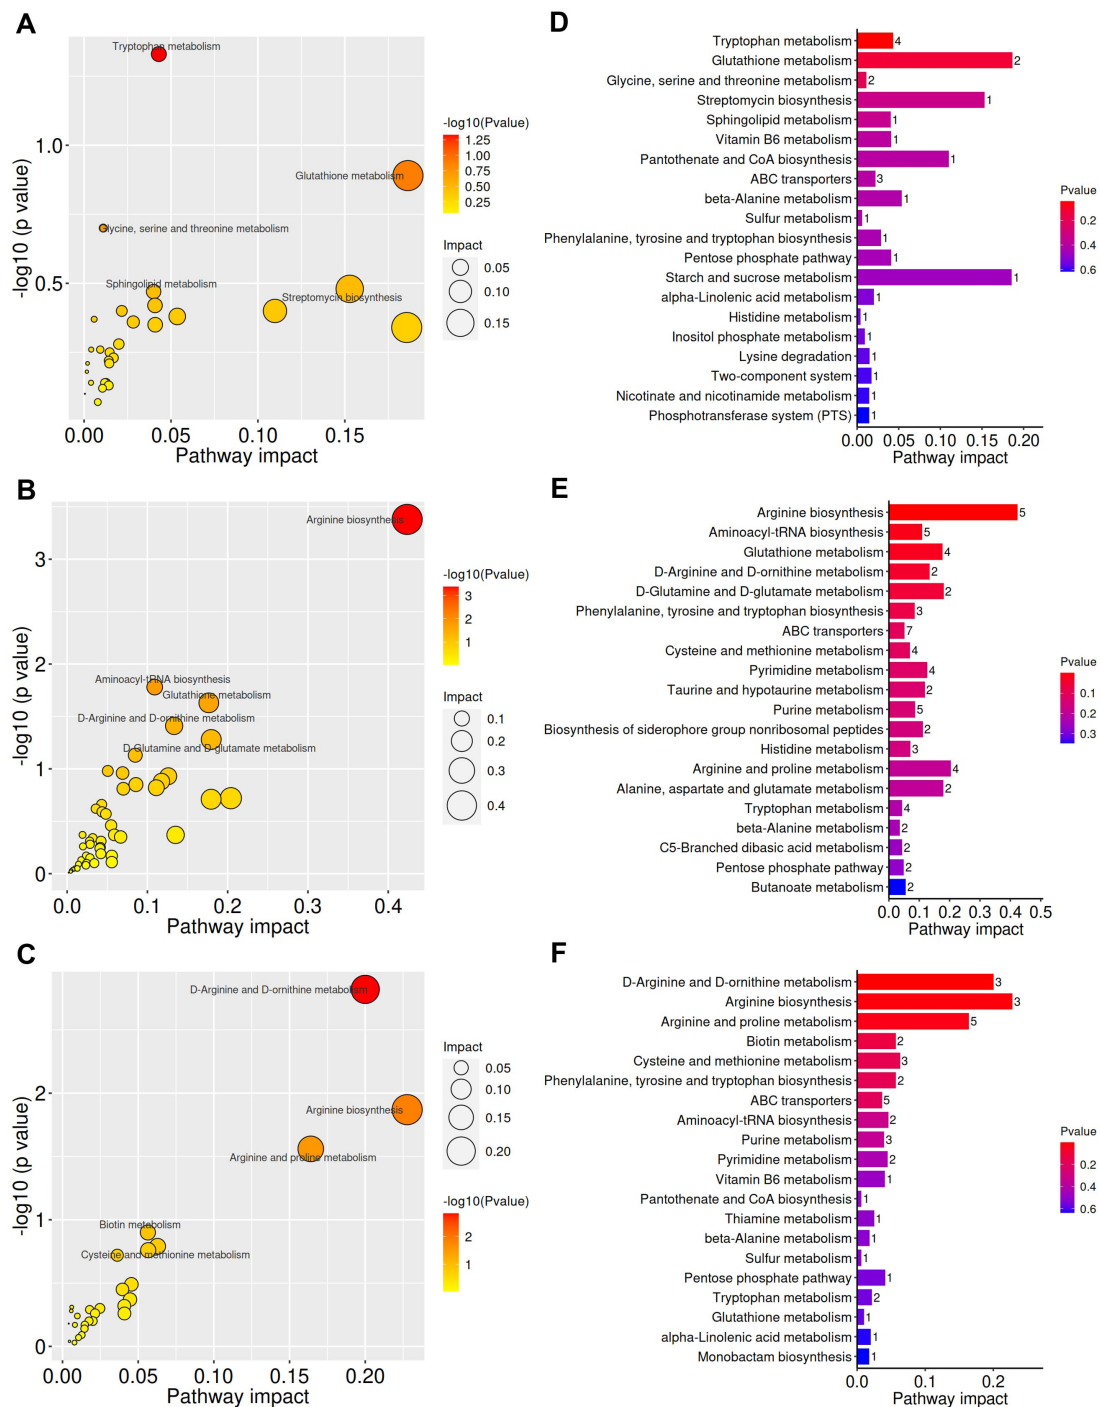

**Figure S6. Statistics and analysis of differential metabolites in the different treatments in DOM groups.** Bubble diagram (A–C) and bar graph (D–F) of metabolic pathways. A and D belong to the “LH vs. LL” groups; B and E belong to the “HL vs. LL” groups; C and F belong to the “HH vs. LL” groups. LL, 26°C and 400 ppm; LH, 26°C and 1000 ppm; HL, 30°C and 400 ppm; HH, 30°C and 1000 ppm.

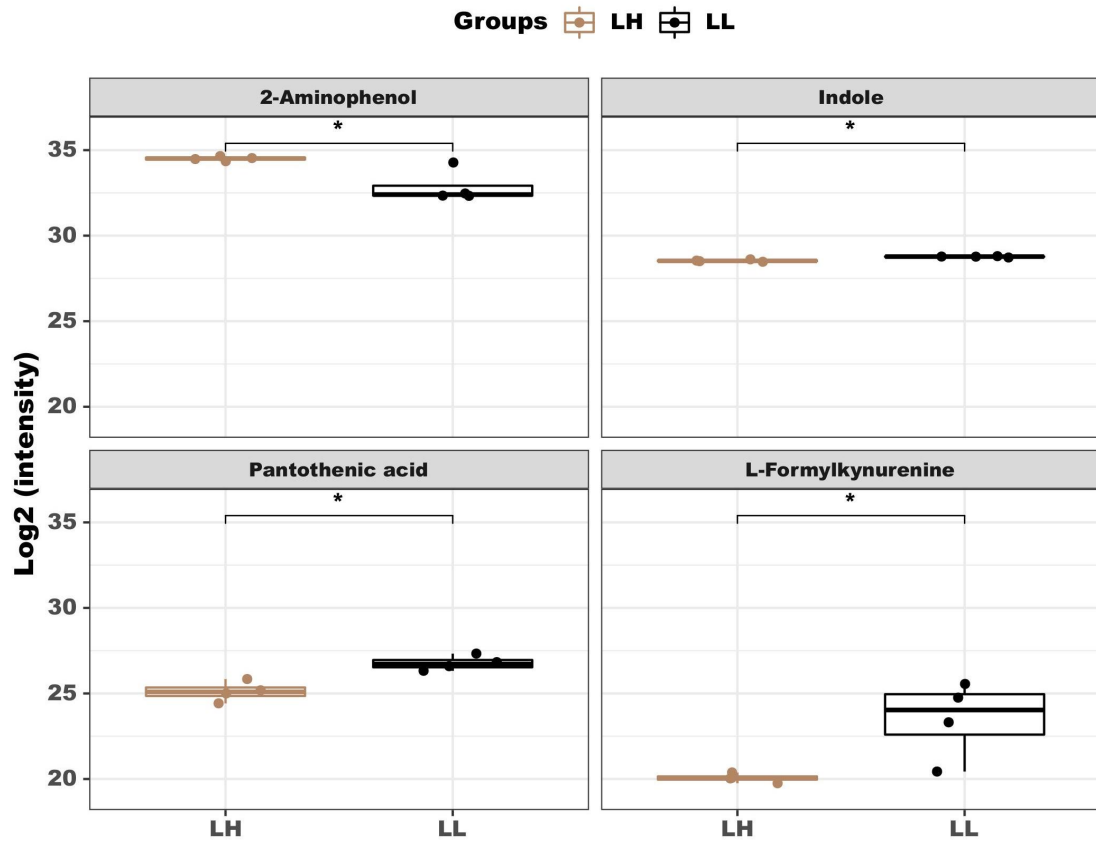

Figure S7. Box plots of differential metabolites in DOM treatments: 2-Aminophenol, indole, picolinic acid, and L-formylkynurenine. The Wilcoxon rank sum tests were performed using the 'wilcox.test' function in R. Asterisks represent significance as follows: \*,  $p < 0.05$ .



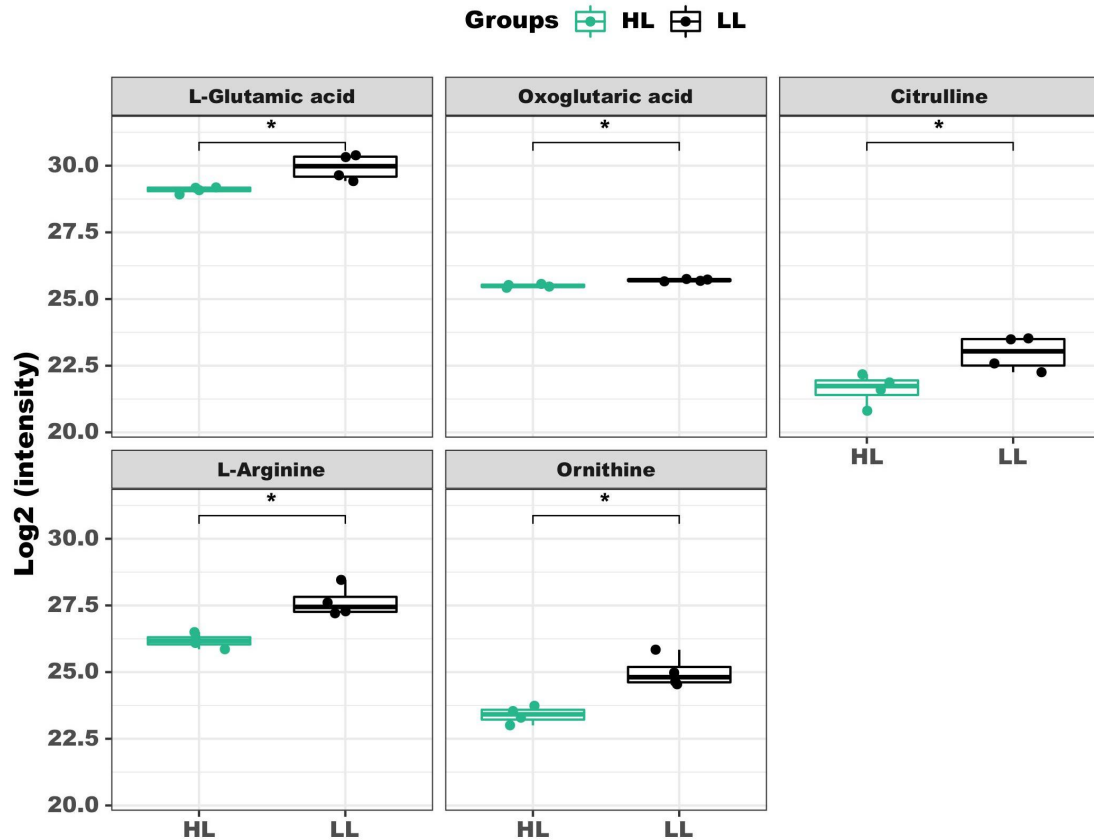

**Figure S8. Box plots of differential metabolites in DOM treatments: L-Glutamic acid, oxoglutaric acid, citrulline, L-arginine, and ornithine.** The Wilcoxon rank sum tests were performed using ‘wilcox.test’ function in R. Asterisks represent significance as follows: \*,  $p < 0.05$ .

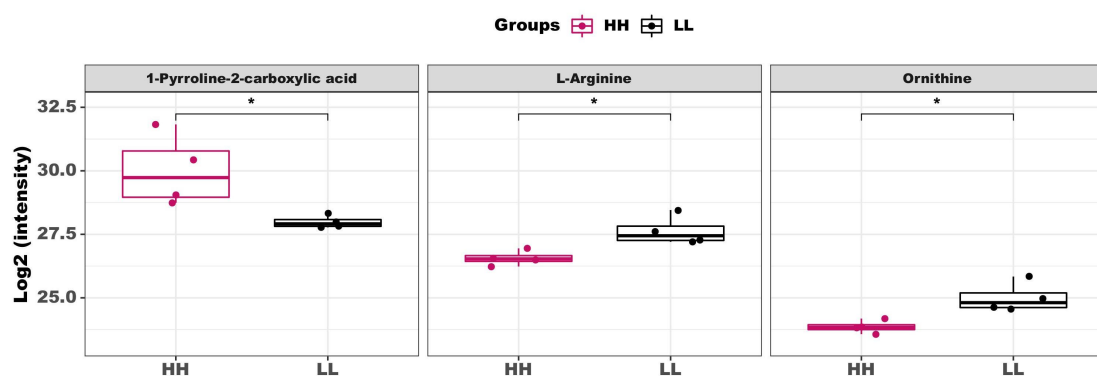

**Figure S9. Box plots of differential metabolites in DOM treatments: 1-Pyrroline-2-carboxylic acid, L-arginine, and ornithine.** The Wilcoxon rank sum tests were performed using ‘wilcox.test’ function in R. Asterisks represent significance as follows: \*,  $p < 0.05$ .

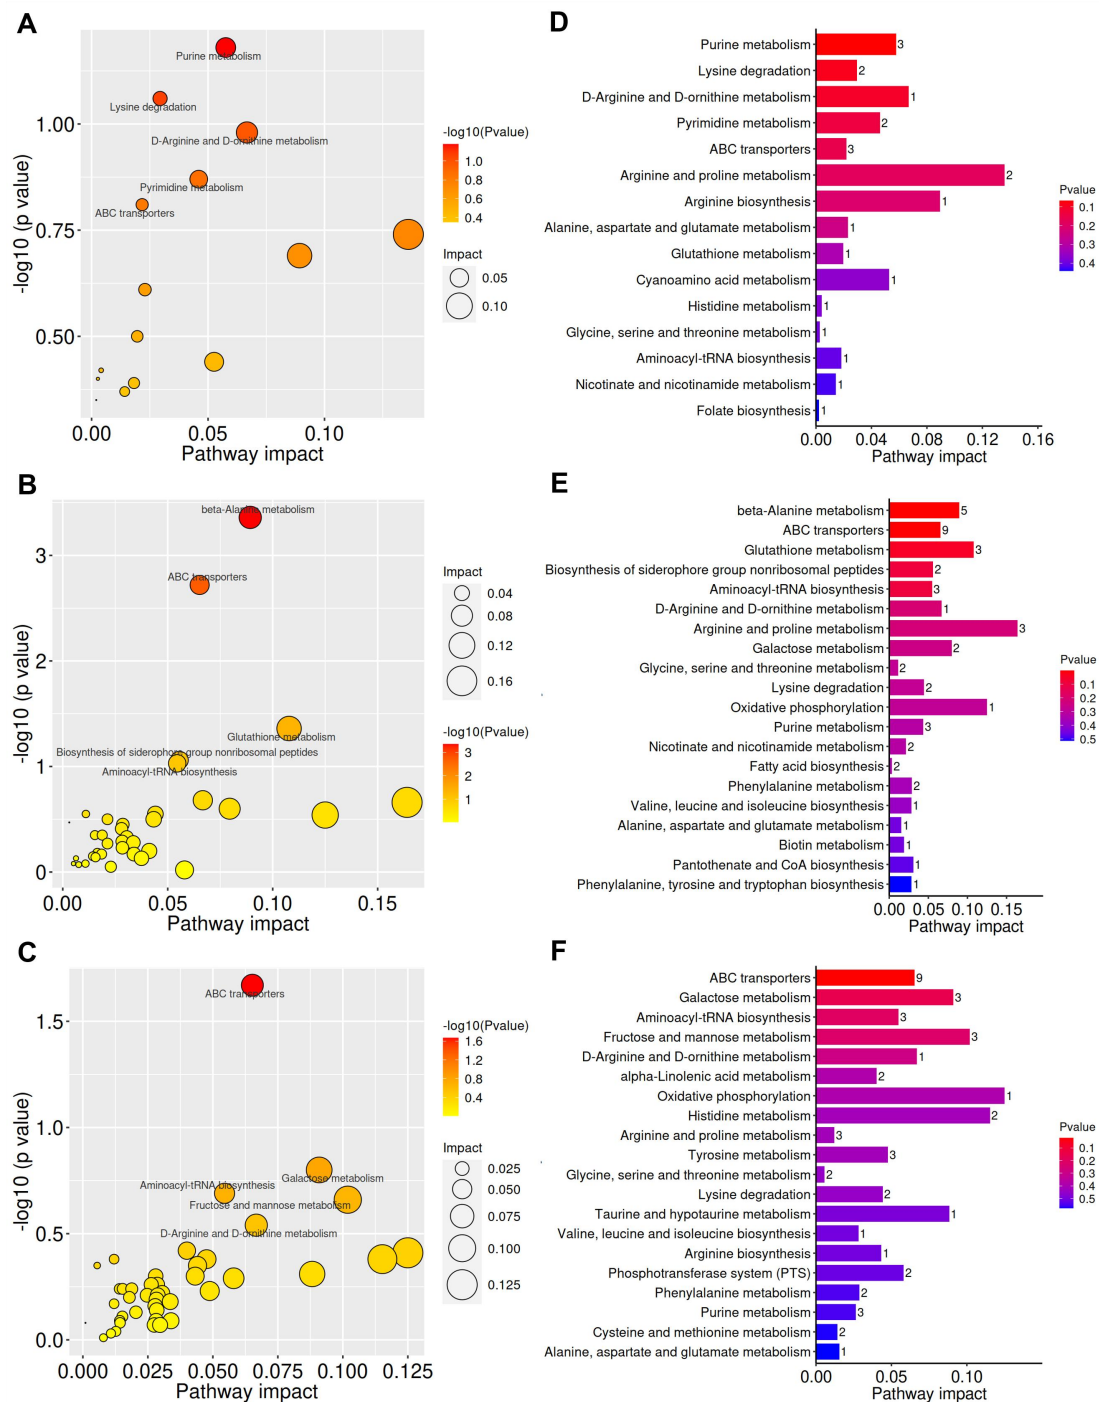

**Figure S10. Statistics and analysis of differential metabolites in the different treatments in LOM groups.** Bubble diagram (A–C) and bar graph (D–F) of metabolic pathways. A and D belong to the “LH vs. LL” groups; B and E belong to the “HL vs. LL” groups; C and F belong to the “HH vs. LL” groups. LL, 26°C and 400 ppm; LH, 26°C and 1000 ppm; HL, 30°C and 400 ppm; HH, 30°C and 1000 ppm.

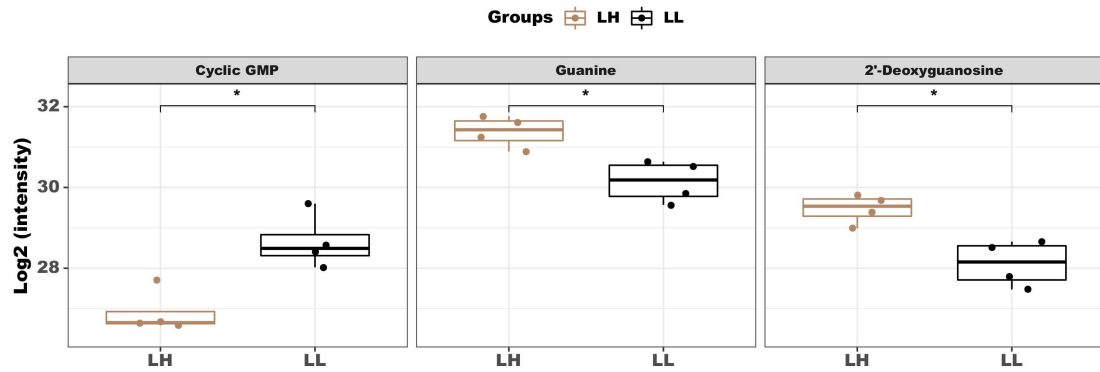

**Figure S11. Box plots of differential metabolites in LOM treatments: Cyclic GMP, guanine, and 2'-deoxyguanosine.** The Wilcoxon rank sum tests were performed using 'wilcox.test' function in R. Asterisks represent significance as follows: \*,  $p < 0.05$ .

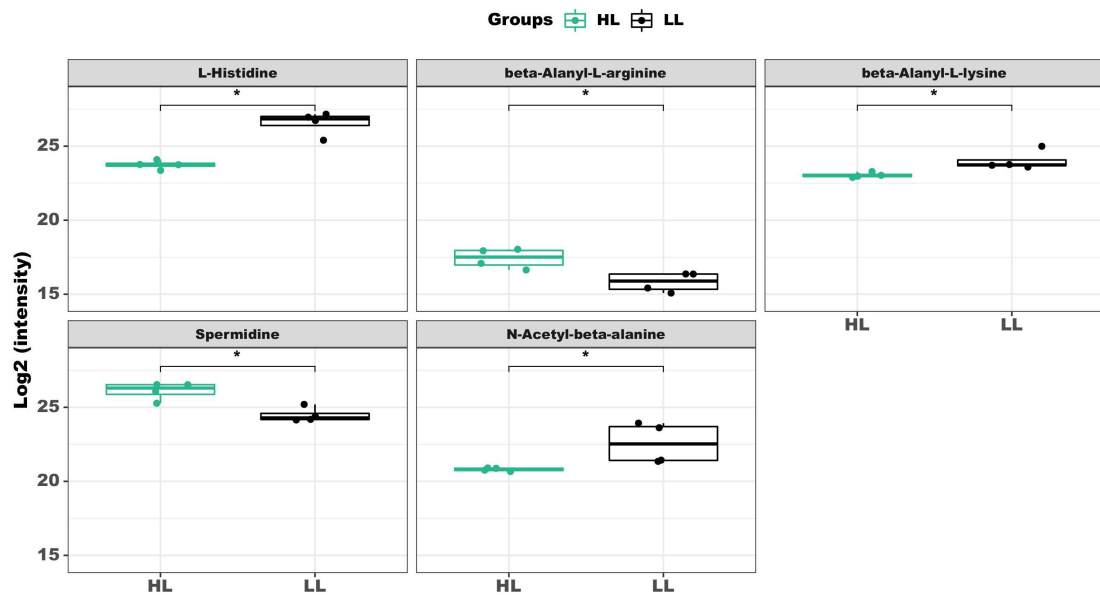

**Figure S12. Box plots of differential metabolites in LOM treatments: L-Histidine; beta-alanyl-L-arginine, beta-alanyl-L-lysine, spermidine, and N-acetyl-beta-alanine.** The Wilcoxon rank sum tests were performed using 'wilcox.test' function in R. Asterisks represent significance as follows: \*,  $p < 0.05$ .

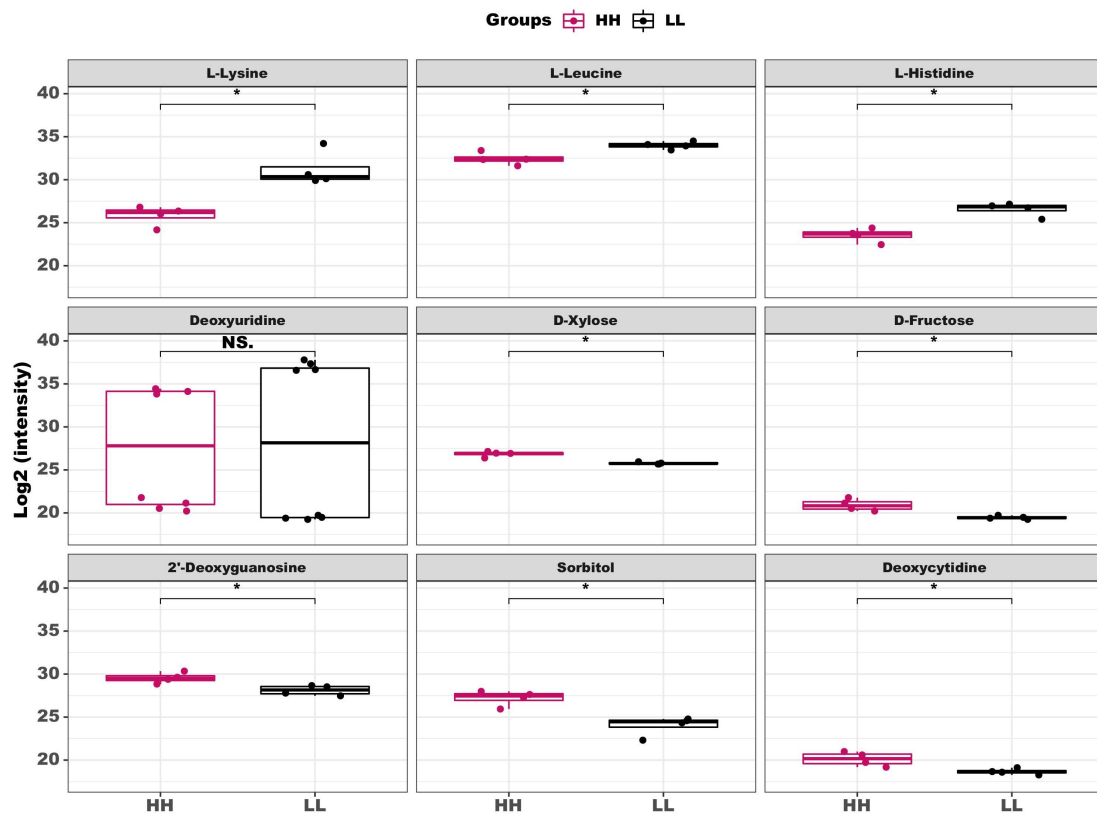

**Figure S13. Box plots of differential metabolites in LOM treatments: L-Lysine, L-leucine, L-histidine, deoxyuridine, D-xylose, D-fructose, 2'-deoxyguanosine, sorbitol, and deoxycytidine.** The Wilcoxon rank sum tests were performed using 'wilcox.test' function in R. Asterisks represent significance as follows: \*,  $p < 0.05$ . NS stands for non-significant.

**Table S1. The results of differential metabolites in the LH vs LL group of DOM.**

| KEGG   | Metabolites                | VIP  | Regulation | P value |
|--------|----------------------------|------|------------|---------|
| C14691 | Triethylamine              | 1.61 | ↑          | <0.05   |
| C01987 | 2-Aminophenol              | 1.59 | ↑          | <0.05   |
| C00463 | Indole                     | 1.88 | ↑          | <0.05   |
| C00719 | Betaine                    | 1.87 | ↑          | <0.05   |
| C11004 | 2,6-Dimethylaniline        | 1.82 | ↑          | <0.05   |
| C00153 | Niacinamide                | 1.02 | ↑          | <0.05   |
| C10164 | Picolinic acid             | 1.43 | ↑          | <0.05   |
| C00436 | N-Carbamoylputrescine      | 1.64 | ↑          | <0.05   |
| C02486 | Beta-Leucine               | 1.62 | ↑          | <0.05   |
| C05650 | Tetrahydropteridine        | 1.81 | ↑          | <0.05   |
| C06231 | Ectoine                    | 1.96 | ↑          | <0.05   |
| C05572 | 4-Oxoglutaramate           | 1.62 | ↑          | <0.05   |
| C00314 | Pyridoxine                 | 1.54 | ↑          | <0.05   |
| C01551 | Allantoin                  | 1.71 | ↑          | <0.05   |
| C03153 | N5-Methyl-L-glutamine      | 1.85 | ↑          | <0.05   |
| C00318 | L-Carnitine                | 1.88 | ↑          | <0.05   |
| C05343 | (R)-4-Hydroxymandelate     | 1.93 | ↑          | <0.05   |
| C02710 | N-Acetylleucine            | 1.71 | ↑          | <0.05   |
| C01047 | L-Theanine                 | 1.79 | ↑          | <0.05   |
| C02727 | N6-Acetyl-L-lysine         | 1.68 | ↑          | <0.05   |
| C12989 | N-Alpha-acetyllysine       | 1.74 | ↑          | <0.05   |
| C00355 | L-Dopa                     | 1.53 | ↑          | <0.05   |
| C06841 | Baclofen                   | 1.73 | ↑          | <0.05   |
| C03017 | Propionylcarnitine         | 1.80 | ↑          | <0.05   |
| C03740 | gamma-Glutamylalanine      | 1.60 | ↑          | <0.05   |
| C00864 | Pantothenic acid           | 1.74 | ↑          | <0.05   |
| C16765 | Citrinin                   | 1.84 | ↑          | <0.05   |
| C07375 | Procaine                   | 1.57 | ↑          | <0.05   |
| C02700 | L-Formylkynurenine         | 1.53 | ↑          | <0.05   |
| C03137 | N-Acetyl-D-tryptophan      | 1.64 | ↑          | <0.05   |
| C05926 | Neopterin                  | 1.56 | ↑          | <0.05   |
| C09827 | (S)-Pinocembrin            | 1.69 | ↑          | <0.05   |
| C13454 | Xanthoxic acid             | 1.79 | ↑          | <0.05   |
| C05282 | (5-L-Glutamyl)-L-glutamate | 1.78 | ↑          | <0.05   |
| C07239 | Ritodrine                  | 1.63 | ↑          | <0.05   |
| C16324 | 9,10-EOT                   | 1.63 | ↑          | <0.05   |
| C07319 | Sumatriptan                | 1.47 | ↑          | <0.05   |
| C20674 | N7-Methylguanosine         | 1.81 | ↑          | <0.05   |
| C00836 | Sphinganine                | 1.03 | ↑          | <0.05   |
| C08019 | Oxymorphone                | 1.50 | ↑          | <0.05   |
| C14749 | 19(S)-HETE                 | 1.66 | ↑          | <0.05   |
| C00051 | Glutathione                | 1.65 | ↑          | <0.05   |

|        |                        |      |   |       |
|--------|------------------------|------|---|-------|
| C00575 | Cyclic AMP             | 1.59 | ↑ | <0.05 |
| C03557 | Ciliatine              | 1.85 | ↓ | <0.05 |
| C16357 | 3-Methylxanthine       | 1.91 | ↓ | <0.05 |
| C00345 | 6-Phosphogluconic acid | 1.86 | ↓ | <0.05 |
| C00092 | Glucose 6-phosphate    | 1.74 | ↓ | <0.05 |
| C10098 | Kaempferide            | 2.28 | ↓ | <0.05 |
| C15519 | 25-Hydroxycholesterol  | 2.17 | ↓ | <0.05 |
| C11142 | Dimethyl sulfone       | 1.72 | ↓ | <0.05 |

VIP: variable importance for the projection; ↑, up-regulation; ↓, down-regulation.

**Table S2. The results of differential metabolites in the HL vs LL group of DOM.**

| KEGG   | Metabolites                   | VIP  | Regulation | P value |
|--------|-------------------------------|------|------------|---------|
| C12455 | 5-Aminopentanal               | 1.27 | ↑          | <0.05   |
| C05942 | Pyrrole-2-carboxylic acid     | 1.67 | ↑          | <0.05   |
| C00463 | Indole                        | 1.69 | ↑          | <0.05   |
| C02115 | 2-Methylserine                | 1.42 | ↑          | <0.05   |
| C11004 | 2,6-Dimethylaniline           | 1.71 | ↑          | <0.05   |
| C00153 | Niacinamide                   | 1.06 | ↑          | <0.05   |
| C01108 | 1,2,3-Trihydroxybenzene       | 1.29 | ↑          | <0.05   |
| C00178 | Thymine                       | 1.26 | ↑          | <0.05   |
| C00026 | Oxoglutaric acid              | 1.64 | ↑          | <0.05   |
| C00123 | L-Leucine                     | 1.46 | ↑          | <0.05   |
| C01015 | cis-4-Hydroxy-L-proline       | 1.18 | ↑          | <0.05   |
| C17883 | 2-Methoxy-4-vinylphenol       | 1.68 | ↑          | <0.05   |
| C16630 | 5,6-Dihydro-5-fluorouracil    | 1.62 | ↑          | <0.05   |
| C02505 | 2-Phenylacetamide             | 1.40 | ↑          | <0.05   |
| C00262 | Hypoxanthine                  | 1.39 | ↑          | <0.05   |
| C00483 | Tyramine                      | 1.28 | ↑          | <0.05   |
| C00568 | p-Aminobenzoic acid           | 1.41 | ↑          | <0.05   |
| C06231 | Ectoine                       | 1.76 | ↑          | <0.05   |
| C00955 | Tryptophanol                  | 1.47 | ↑          | <0.05   |
| C05572 | 4-Oxoglutaramate              | 1.56 | ↑          | <0.05   |
| C00025 | L-Glutamic acid               | 1.46 | ↑          | <0.05   |
| C00073 | L-Methionine                  | 1.64 | ↑          | <0.05   |
| C00196 | 2-Pyrocatechuic acid          | 1.76 | ↑          | <0.05   |
| C19463 | 1,5-Naphthalenediamine        | 1.44 | ↑          | <0.05   |
| C01551 | Allantoin                     | 1.62 | ↑          | <0.05   |
| C03153 | N5-Methyl-L-glutamine         | 1.69 | ↑          | <0.05   |
| C00318 | L-Carnitine                   | 1.55 | ↑          | <0.05   |
| C06180 | Anabasine                     | 1.54 | ↑          | <0.05   |
| C10447 | 3,4-Dihydroxyphenylpropanoate | 1.41 | ↑          | <0.05   |
| C02989 | L-Methionine S-oxide          | 1.47 | ↑          | <0.05   |
| C05343 | (R)-4-Hydroxymandelate        | 1.47 | ↑          | <0.05   |
| C02637 | 3-Dehydroshikimate            | 1.43 | ↑          | <0.05   |

|        |                                        |      |   |       |
|--------|----------------------------------------|------|---|-------|
| C02710 | N-Acetylleucine                        | 1.75 | ↑ | <0.05 |
| C01047 | L-Theanine                             | 1.69 | ↑ | <0.05 |
| C00327 | Citrulline                             | 1.40 | ↑ | <0.05 |
| C01092 | 8-Amino-7-oxononanoate                 | 1.65 | ↑ | <0.05 |
| C12989 | N-Alpha-acetyllysine                   | 1.52 | ↑ | <0.05 |
| C02155 | Glycylleucine                          | 1.48 | ↑ | <0.05 |
| C03626 | Asymmetric dimethylarginine            | 1.50 | ↑ | <0.05 |
| C03955 | N6-Acetyl-N6-hydroxy-L-lysine          | 1.65 | ↑ | <0.05 |
| C03519 | N-Acetyl-L-phenylalanine               | 1.30 | ↑ | <0.05 |
| C06841 | Baclofen                               | 1.38 | ↑ | <0.05 |
| C05341 | beta-Alanyl-L-lysine                   | 1.43 | ↑ | <0.05 |
| C03740 | gamma-Glutamylalanine                  | 1.53 | ↑ | <0.05 |
| C00299 | Uridine                                | 1.73 | ↑ | <0.05 |
| C04337 | N(omega)-Nitro-L-arginine methyl ester | 1.36 | ↑ | <0.05 |
| C02700 | L-Formylkynurenine                     | 1.41 | ↑ | <0.05 |
| C03137 | N-Acetyl-D-tryptophan                  | 1.73 | ↑ | <0.05 |
| C00647 | Pyridoxamine 5'-phosphate              | 1.56 | ↑ | <0.05 |
| C06960 | Diphenhydramine                        | 1.66 | ↑ | <0.05 |
| C00774 | Phloretin                              | 1.52 | ↑ | <0.05 |
| C09980 | Yangonin                               | 1.48 | ↑ | <0.05 |
| C00670 | Glycerophosphocholine                  | 1.55 | ↑ | <0.05 |
| C11500 | 5'-Dehydroadenosine                    | 1.48 | ↑ | <0.05 |
| C20579 | Cyclopeptine                           | 1.42 | ↑ | <0.05 |
| C01595 | Linoleic acid                          | 1.44 | ↑ | <0.05 |
| C02494 | 1-Methyladenosine                      | 1.37 | ↑ | <0.05 |
| C00387 | Guanosine                              | 1.48 | ↑ | <0.05 |
| C07239 | Ritodrine                              | 1.37 | ↑ | <0.05 |
| C21016 | Ophthalmate                            | 1.16 | ↑ | <0.05 |
| C07881 | Dyclonine                              | 1.61 | ↑ | <0.05 |
| C07319 | Sumatriptan                            | 1.58 | ↑ | <0.05 |
| C20674 | N7-Methylguanosine                     | 1.40 | ↑ | <0.05 |
| C00170 | 5'-Methylthioadenosine                 | 1.71 | ↑ | <0.05 |
| C08019 | Oxymorphone                            | 1.33 | ↑ | <0.05 |
| C06967 | Dobutamine                             | 1.75 | ↑ | <0.05 |
| C05324 | Nicotianamine                          | 1.52 | ↑ | <0.05 |
| C14749 | 19(S)-HETE                             | 1.38 | ↑ | <0.05 |
| C00239 | dCMP                                   | 1.58 | ↑ | <0.05 |
| C00575 | Cyclic AMP                             | 1.25 | ↑ | <0.05 |
| C00360 | dAMP                                   | 1.49 | ↑ | <0.05 |
| C06176 | Senecionine                            | 1.59 | ↑ | <0.05 |
| C07119 | Medroxyprogesterone                    | 1.74 | ↑ | <0.05 |
| C21160 | L-Alanyl-gamma-D-glutamyl-L-lysine     | 1.50 | ↑ | <0.05 |
| C00908 | Gentamicin C1a                         | 1.43 | ↑ | <0.05 |
| C01746 | Piperidine                             | 1.38 | ↑ | <0.05 |

|        |                        |      |   |       |
|--------|------------------------|------|---|-------|
| C01073 | N-Acetyl-beta-alanine  | 1.80 | ↓ | <0.05 |
| C00077 | Ornithine              | 1.97 | ↓ | <0.05 |
| C00181 | D-Xylose               | 1.43 | ↓ | <0.05 |
| C00062 | L-Arginine             | 1.96 | ↓ | <0.05 |
| C00977 | Tryptophanamide        | 1.81 | ↓ | <0.05 |
| C00078 | L-Tryptophan           | 1.81 | ↓ | <0.05 |
| C00620 | Ribose 1-phosphate     | 1.63 | ↓ | <0.05 |
| C00669 | gamma-Glutamylcysteine | 1.84 | ↓ | <0.05 |
| C00345 | 6-Phosphogluconic acid | 1.85 | ↓ | <0.05 |
| C00389 | Quercetin              | 1.88 | ↓ | <0.05 |
| C00364 | dTMP                   | 1.84 | ↓ | <0.05 |
| C16417 | Xanthohumol            | 2.02 | ↓ | <0.05 |

VIP: variable importance for the projection; ↑, up-regulation; ↓, down-regulation.

**Table S3. The results of differential metabolites in the HH vs LL group of DOM.**

| KEGG   | Metabolites                         | VIP  | Regulation | P value |
|--------|-------------------------------------|------|------------|---------|
| C11118 | N-Methyl-2-pyrrolidinone            | 1.57 | ↑          | <0.05   |
| C00388 | Histamine                           | 1.60 | ↑          | <0.05   |
| C05942 | Pyrrole-2-carboxylic acid           | 1.54 | ↑          | <0.05   |
| C03564 | 1-Pyrroline-2-carboxylic acid       | 1.38 | ↑          | <0.05   |
| C00463 | Indole                              | 1.66 | ↑          | <0.05   |
| C00719 | Betaine                             | 1.76 | ↑          | <0.05   |
| C11004 | 2,6-Dimethylaniline                 | 1.83 | ↑          | <0.05   |
| C10164 | Picolinic acid                      | 1.40 | ↑          | <0.05   |
| C02183 | Phloroglucinol                      | 1.63 | ↑          | <0.05   |
| C05938 | L-4-Hydroxyglutamate semialdehyde   | 1.15 | ↑          | <0.05   |
| C01015 | cis-4-Hydroxy-L-proline             | 1.56 | ↑          | <0.05   |
| C02486 | Beta-Leucine                        | 1.66 | ↑          | <0.05   |
| C05650 | Tetrahydropteridine                 | 1.45 | ↑          | <0.05   |
| C10761 | p-Anisaldehyde                      | 1.21 | ↑          | <0.05   |
| C04294 | 5-(2-Hydroxyethyl)-4-methylthiazole | 1.52 | ↑          | <0.05   |
| C00073 | L-Methionine                        | 1.57 | ↑          | <0.05   |
| C01551 | Allantoin                           | 1.49 | ↑          | <0.05   |
| C03153 | N5-Methyl-L-glutamine               | 1.74 | ↑          | <0.05   |
| C05343 | (R)-4-Hydroxymandelate              | 1.71 | ↑          | <0.05   |
| C02710 | N-Acetylleucine                     | 1.52 | ↑          | <0.05   |
| C01047 | L-Theanine                          | 1.77 | ↑          | <0.05   |
| C00327 | Citrulline                          | 1.55 | ↑          | <0.05   |
| C01092 | 8-Amino-7-oxononanoate              | 1.72 | ↑          | <0.05   |
| C02727 | N6-Acetyl-L-lysine                  | 1.52 | ↑          | <0.05   |
| C12989 | N-Alpha-acetyllysine                | 1.59 | ↑          | <0.05   |
| C02155 | Glycylleucine                       | 1.55 | ↑          | <0.05   |
| C07577 | 3,4-Methylenedioxyamphetamine       | 1.66 | ↑          | <0.05   |
| C05944 | Pantothenol                         | 1.32 | ↑          | <0.05   |



|        |                                          |      |   |       |
|--------|------------------------------------------|------|---|-------|
| C06841 | Baclofen                                 | 1.63 | ↑ | <0.05 |
| C01909 | Dethiobiotin                             | 1.25 | ↑ | <0.05 |
| C05341 | beta-Alanyl-L-lysine                     | 1.60 | ↑ | <0.05 |
| C03017 | Propionylcarnitine                       | 1.73 | ↑ | <0.05 |
| C09627 | Capsidiol                                | 1.58 | ↑ | <0.05 |
| C08322 | Myristoleic acid                         | 1.73 | ↑ | <0.05 |
| C00526 | Deoxyuridine                             | 1.58 | ↑ | <0.05 |
| C09376 | Confertifolin                            | 1.40 | ↑ | <0.05 |
| C03137 | N-Acetyl-D-tryptophan                    | 1.72 | ↑ | <0.05 |
| C00647 | Pyridoxamine 5'-phosphate                | 1.50 | ↑ | <0.05 |
| C13456 | Abscisic alcohol                         | 1.28 | ↑ | <0.05 |
| C00774 | Phloretin                                | 1.69 | ↑ | <0.05 |
| C09980 | Yanongin                                 | 1.52 | ↑ | <0.05 |
| C11500 | 5'-Dehydroadenosine                      | 1.54 | ↑ | <0.05 |
| C02713 | N-Acetylmuramate                         | 1.46 | ↑ | <0.05 |
| C21730 | epsilon-(gamma-L-Glutamyl)-L-lysine      | 1.78 | ↑ | <0.05 |
|        | 1-(3,4-Dihydroxyphenyl)-5-hydroxy-3-deca |      |   |       |
| C17748 | none                                     | 1.58 | ↑ | <0.05 |
| C00387 | Guanosine                                | 1.58 | ↑ | <0.05 |
| C21016 | Ophthalmate                              | 1.74 | ↑ | <0.05 |
| C16324 | 9,10-EOT                                 | 1.51 | ↑ | <0.05 |
| C00170 | 5'-Methylthioadenosine                   | 1.79 | ↑ | <0.05 |
| C08019 | Oxymorphone                              | 1.41 | ↑ | <0.05 |
| C06967 | Dobutamine                               | 1.77 | ↑ | <0.05 |
| C05324 | Nicotianamine                            | 1.66 | ↑ | <0.05 |
| C14749 | 19(S)-HETE                               | 1.47 | ↑ | <0.05 |
| C00239 | dCMP                                     | 1.51 | ↑ | <0.05 |
| C00575 | Cyclic AMP                               | 1.34 | ↑ | <0.05 |
| C00360 | dAMP                                     | 1.62 | ↑ | <0.05 |
| C06176 | Senecionine                              | 1.71 | ↑ | <0.05 |
| C08380 | 2-Heptanone                              | 1.77 | ↓ | <0.05 |
| C00077 | Ornithine                                | 1.79 | ↓ | <0.05 |
| C00493 | Shikimic acid                            | 1.67 | ↓ | <0.05 |
| C00062 | L-Arginine                               | 1.75 | ↓ | <0.05 |
| C00977 | Tryptophanamide                          | 1.78 | ↓ | <0.05 |
| C00345 | 6-Phosphogluconic acid                   | 1.77 | ↓ | <0.05 |
| C10098 | Kaempferide                              | 1.95 | ↓ | <0.05 |
| C14828 | 9,10-DHOME                               | 1.73 | ↓ | <0.05 |
| C16417 | Xanthohumol                              | 1.80 | ↓ | <0.05 |
| C11142 | Dimethyl sulfone                         | 1.70 | ↓ | <0.05 |

VIP: variable importance for the projection; ↑, up-regulation; ↓, down-regulation.

**Table S4. The results of differential metabolites in the LH vs LL group of LOM.**

| KEGG | Metabolites | VIP | Regulation | P value |
|------|-------------|-----|------------|---------|
|------|-------------|-----|------------|---------|

|        |                             |      |   |       |
|--------|-----------------------------|------|---|-------|
| C14691 | Triethylamine               | 1.69 | ↑ | <0.05 |
| C00178 | Thymine                     | 2.07 | ↑ | <0.05 |
| C00408 | Pipecolic acid              | 2.14 | ↑ | <0.05 |
| C03440 | cis-4-Hydroxy-D-proline     | 1.66 | ↑ | <0.05 |
| C06231 | Ectoïne                     | 2.24 | ↑ | <0.05 |
| C05572 | 4-Oxoglutaramate            | 2.01 | ↑ | <0.05 |
| C12115 | 3-Amino-4-hydroxybenzoate   | 2.19 | ↑ | <0.05 |
| C19719 | D-Alanyl-D-serine           | 1.56 | ↑ | <0.05 |
| C01551 | Allantoin                   | 1.90 | ↑ | <0.05 |
| C02710 | N-Acetyl-leucine            | 1.77 | ↑ | <0.05 |
| C00327 | Citrulline                  | 2.04 | ↑ | <0.05 |
| C02727 | N6-Acetyl-L-lysine          | 1.84 | ↑ | <0.05 |
| C12989 | N-Alpha-acetyllysine        | 2.23 | ↑ | <0.05 |
| C03017 | Propionylcarnitine          | 2.20 | ↑ | <0.05 |
| C02587 | Pyrimidodiazepine           | 1.48 | ↑ | <0.05 |
| C00526 | Deoxyuridine                | 2.07 | ↑ | <0.05 |
| C09317 | Xanthyletin                 | 1.62 | ↑ | <0.05 |
| C03137 | N-Acetyl-D-tryptophan       | 2.39 | ↑ | <0.05 |
| C05841 | Nicotinate D-ribonucleoside | 1.63 | ↑ | <0.05 |
| C00774 | Phloretin                   | 2.08 | ↑ | <0.05 |
| C11500 | 5'-Dehydroadenosine         | 2.25 | ↑ | <0.05 |
| C19530 | Sulfamethazine              | 1.85 | ↑ | <0.05 |
| C11501 | 9-Riburonosyladenine        | 2.12 | ↑ | <0.05 |
| C05324 | Nicotianamine               | 2.25 | ↑ | <0.05 |
| C00942 | Cyclic GMP                  | 2.04 | ↑ | <0.05 |
| C00134 | Putrescine                  | 1.41 | ↑ | <0.05 |
| C08380 | 2-Heptanone                 | 1.84 | ↓ | <0.05 |
| C00152 | L-Asparagine                | 1.68 | ↓ | <0.05 |
| C00330 | 2'-Deoxyguanosine           | 2.10 | ↓ | <0.05 |
| C00242 | Guanine                     | 2.07 | ↓ | <0.05 |

VIP: variable importance for the projection; ↑, up-regulation; ↓, down-regulation.

**Table S5. The results of differential metabolites in the HL vs LL group of LOM.**

| KEGG   | Metabolites             | VIP  | Regulation | P value |
|--------|-------------------------|------|------------|---------|
| C14691 | Triethylamine           | 1.71 | ↑          | <0.05   |
| C00463 | Indole                  | 1.83 | ↑          | <0.05   |
| C00719 | Betaine                 | 1.69 | ↑          | <0.05   |
| C01108 | 1,2,3-Trihydroxybenzene | 1.47 | ↑          | <0.05   |
| C11918 | Maltol                  | 1.44 | ↑          | <0.05   |
| C00408 | Pipecolic acid          | 1.88 | ↑          | <0.05   |
| C00123 | L-Leucine               | 1.72 | ↑          | <0.05   |
| C03440 | cis-4-Hydroxy-D-proline | 1.88 | ↑          | <0.05   |
| C00805 | Salicylic acid          | 1.50 | ↑          | <0.05   |
| C06231 | Ectoïne                 | 1.80 | ↑          | <0.05   |

|        |                                        |      |   |       |
|--------|----------------------------------------|------|---|-------|
| C01046 | N-Methyl-L-glutamic acid               | 1.73 | ↑ | <0.05 |
| C00940 | 2-Keto-glutaramic acid                 | 1.70 | ↑ | <0.05 |
| C00966 | 2-Dehydropanoate                       | 1.53 | ↑ | <0.05 |
| C00047 | L-Lysine                               | 1.65 | ↑ | <0.05 |
| C00135 | L-Histidine                            | 1.85 | ↑ | <0.05 |
| C03153 | N5-Methyl-L-glutamine                  | 1.57 | ↑ | <0.05 |
| C06180 | Anabasine                              | 1.83 | ↑ | <0.05 |
| C02989 | L-Methionine S-oxide                   | 1.61 | ↑ | <0.05 |
| C05343 | (R)-4-Hydroxymandelate                 | 1.65 | ↑ | <0.05 |
| C11016 | Diphenylamine                          | 1.67 | ↑ | <0.05 |
| C02710 | N-Acetylleucine                        | 1.76 | ↑ | <0.05 |
| C10454 | Methyleugenol                          | 1.73 | ↑ | <0.05 |
| C00984 | D-Galactose                            | 1.79 | ↑ | <0.05 |
| C00794 | Sorbitol                               | 1.42 | ↑ | <0.05 |
| C03626 | Asymmetric dimethylarginine            | 1.84 | ↑ | <0.05 |
| C05341 | beta-Alanyl-L-lysine                   | 1.48 | ↑ | <0.05 |
| C03740 | gamma-Glutamylalanine                  | 1.48 | ↑ | <0.05 |
| C00931 | Porphobilinogen                        | 1.37 | ↑ | <0.05 |
| C00526 | Deoxyuridine                           | 1.88 | ↑ | <0.05 |
| C04337 | N(omega)-Nitro-L-arginine methyl ester | 1.34 | ↑ | <0.05 |
| C05340 | beta-Alanyl-L-arginine                 | 1.56 | ↑ | <0.05 |
| C00399 | Ubiquinone-1                           | 1.80 | ↑ | <0.05 |
| D05229 | OPEO                                   | 1.39 | ↑ | <0.05 |
| C05841 | Nicotinate D-ribonucleoside            | 1.55 | ↑ | <0.05 |
| C00249 | Palmitic acid                          | 1.64 | ↑ | <0.05 |
| C09980 | Yangonin                               | 1.81 | ↑ | <0.05 |
| C00858 | Formononetin                           | 1.55 | ↑ | <0.05 |
| C19530 | Sulfamethazine                         | 1.80 | ↑ | <0.05 |
| C00387 | Guanosine                              | 1.53 | ↑ | <0.05 |
| C01530 | Stearic acid                           | 1.92 | ↑ | <0.05 |
| C07881 | Dyclonine                              | 1.84 | ↑ | <0.05 |
| C05324 | Nicotianamine                          | 1.69 | ↑ | <0.05 |
| C14827 | 9(S)-HPODE                             | 1.86 | ↑ | <0.05 |
| C05484 | Pregnanediol                           | 1.48 | ↑ | <0.05 |
| C02105 | (S)-Reticuline                         | 1.73 | ↑ | <0.05 |
| C08316 | Erucic acid                            | 1.01 | ↑ | <0.05 |
| C21160 | L-Alanyl-gamma-D-glutamyl-L-lysine     | 1.60 | ↑ | <0.05 |
| C00942 | Cyclic GMP                             | 1.82 | ↑ | <0.05 |
| C00362 | dGMP                                   | 1.80 | ↑ | <0.05 |
| C11171 | Sodium deoxycholate                    | 1.29 | ↑ | <0.05 |
| C07837 | Fomepizole                             | 1.21 | ↑ | <0.05 |
| C01746 | Piperidine                             | 1.70 | ↑ | <0.05 |
| C00134 | Putrescine                             | 1.88 | ↑ | <0.05 |
| C05332 | Phenylethylamine                       | 1.62 | ↓ | <0.05 |

|        |                       |      |   |       |
|--------|-----------------------|------|---|-------|
| C06813 | Nitrobenzene          | 1.58 | ↓ | <0.05 |
| C01073 | N-Acetyl-beta-alanine | 1.48 | ↓ | <0.05 |
| C01020 | 6-Hydroxynicotinate   | 1.59 | ↓ | <0.05 |
| C00977 | Tryptophanamide       | 1.66 | ↓ | <0.05 |
| C16537 | Pentadecanoic acid    | 1.67 | ↓ | <0.05 |
| C07635 | Epiandrosterone       | 1.95 | ↓ | <0.05 |
| C07461 | Chlorothiazide        | 1.13 | ↓ | <0.05 |
| C16417 | Xanthohumol           | 1.85 | ↓ | <0.05 |
| C00315 | Spermidine            | 1.68 | ↓ | <0.05 |

VIP: variable importance for the projection; ↑, up-regulation; ↓, down-regulation.

**Table S6. The results of differential metabolites in the HH vs LL group of LOM.**

| KEGG   | Metabolites                         | VIP  | Regulation | P value |
|--------|-------------------------------------|------|------------|---------|
| C03564 | 1-Pyrroline-2-carboxylic acid       | 1.30 | ↑          | <0.05   |
| C00463 | Indole                              | 1.50 | ↑          | <0.05   |
| C00860 | L-Histidinol                        | 1.66 | ↑          | <0.05   |
| C11918 | Maltol                              | 1.46 | ↑          | <0.05   |
| C00408 | Pipecolic acid                      | 1.65 | ↑          | <0.05   |
| C17714 | Heptanoic acid                      | 1.22 | ↑          | <0.05   |
| C00300 | Creatine                            | 1.39 | ↑          | <0.05   |
| C00123 | L-Leucine                           | 1.38 | ↑          | <0.05   |
| C03440 | cis-4-Hydroxy-D-proline             | 1.51 | ↑          | <0.05   |
| C03758 | Dopamine                            | 1.34 | ↑          | <0.05   |
| C10761 | p-Anisaldehyde                      | 1.59 | ↑          | <0.05   |
| C00483 | Tyramine                            | 1.41 | ↑          | <0.05   |
| C00227 | Acetylphosphate                     | 1.51 | ↑          | <0.05   |
| C06231 | Ectoine                             | 1.33 | ↑          | <0.05   |
| C04294 | 5-(2-Hydroxyethyl)-4-methylthiazole | 1.54 | ↑          | <0.05   |
| C00940 | 2-Keto-glutaramic acid              | 1.53 | ↑          | <0.05   |
| C00966 | 2-Dehydropantoate                   | 1.12 | ↑          | <0.05   |
| C00047 | L-Lysine                            | 1.46 | ↑          | <0.05   |
| C05527 | 3-Sulfinylpyruvic acid              | 1.48 | ↑          | <0.05   |
| C12115 | 3-Amino-4-hydroxybenzoate           | 1.50 | ↑          | <0.05   |
| C00135 | L-Histidine                         | 1.52 | ↑          | <0.05   |
| C03030 | Uracil 5-carboxylate                | 1.43 | ↑          | <0.05   |
| C03153 | N5-Methyl-L-glutamine               | 1.65 | ↑          | <0.05   |
| C00318 | L-Carnitine                         | 1.18 | ↑          | <0.05   |
| C01127 | 4-Hydroxy-2-oxoglutaric acid        | 1.55 | ↑          | <0.05   |
| C06180 | Anabasine                           | 1.61 | ↑          | <0.05   |
| C00507 | L-Fucose                            | 1.48 | ↑          | <0.05   |
| C02989 | L-Methionine S-oxide                | 1.33 | ↑          | <0.05   |
| C11016 | Diphenylamine                       | 1.56 | ↑          | <0.05   |
| C05576 | 3,4-Dihydroxyphenylglycol           | 1.58 | ↑          | <0.05   |
| C17366 | (2S,5S)-trans-Carboxymethylproline  | 1.52 | ↑          | <0.05   |

|        |                                        |      |   |       |
|--------|----------------------------------------|------|---|-------|
| C02710 | N-Acetylleucine                        | 1.52 | ↑ | <0.05 |
| C01047 | L-Theanine                             | 1.57 | ↑ | <0.05 |
| C10454 | Methyleugenol                          | 1.66 | ↑ | <0.05 |
| C00095 | D-Fructose                             | 1.44 | ↑ | <0.05 |
| C00984 | D-Galactose                            | 1.60 | ↑ | <0.05 |
| C00794 | Sorbitol                               | 1.46 | ↑ | <0.05 |
| C12989 | N-Alpha-acetyllysine                   | 1.55 | ↑ | <0.05 |
| C07577 | 3,4-Methylenedioxyamphetamine          | 1.44 | ↑ | <0.05 |
| C03626 | Asymmetric dimethylarginine            | 1.60 | ↑ | <0.05 |
| C18828 | Ethirimol                              | 1.50 | ↑ | <0.05 |
| C03017 | Propionylcarnitine                     | 1.35 | ↑ | <0.05 |
| C08322 | Myristoleic acid                       | 1.09 | ↑ | <0.05 |
| C00881 | Deoxycytidine                          | 1.36 | ↑ | <0.05 |
| C00526 | Deoxyuridine                           | 1.63 | ↑ | <0.05 |
| C04337 | N(omega)-Nitro-L-arginine methyl ester | 1.48 | ↑ | <0.05 |
| C09376 | Confertifolin                          | 1.62 | ↑ | <0.05 |
| C03137 | N-Acetyl-D-tryptophan                  | 1.54 | ↑ | <0.05 |
| C09537 | Quadrone                               | 1.44 | ↑ | <0.05 |
| C00399 | Ubiquinone-1                           | 1.55 | ↑ | <0.05 |
| D05229 | OPEO                                   | 1.33 | ↑ | <0.05 |
| C05841 | Nicotinate D-ribonucleoside            | 1.36 | ↑ | <0.05 |
| C09980 | Yangonin                               | 1.62 | ↑ | <0.05 |
| C04148 | Phenylacetylglutamine                  | 1.54 | ↑ | <0.05 |
| C13454 | Xanthoxic acid                         | 1.28 | ↑ | <0.05 |
| C00330 | 2'-Deoxyguanosine                      | 1.38 | ↑ | <0.05 |
| C00858 | Formononetin                           | 1.46 | ↑ | <0.05 |
| C19530 | Sulfamethazine                         | 1.58 | ↑ | <0.05 |
| C11993 | 10-Deoxymethynolide                    | 1.58 | ↑ | <0.05 |
| C01595 | Linoleic acid                          | 1.64 | ↑ | <0.05 |
| C11501 | 9-Riburonosyladenine                   | 1.23 | ↑ | <0.05 |
| C02494 | 1-Methyladenosine                      | 1.64 | ↑ | <0.05 |
| C01530 | Stearic acid                           | 1.30 | ↑ | <0.05 |
| C00376 | Retinal                                | 1.42 | ↑ | <0.05 |
| C07881 | Dyclonine                              | 1.57 | ↑ | <0.05 |
| C16324 | 9,10-EOT                               | 1.50 | ↑ | <0.05 |
| C16321 | 9(S)-HPOT                              | 1.56 | ↑ | <0.05 |
| C11045 | Aspartame                              | 1.25 | ↑ | <0.05 |
| C11285 | Tridemorph                             | 1.42 | ↑ | <0.05 |
| C05324 | Nicotianamine                          | 1.58 | ↑ | <0.05 |
| C14827 | 9(S)-HPODE                             | 1.62 | ↑ | <0.05 |
| C02165 | 12-Keto-tetrahydro-leukotriene B4      | 1.39 | ↑ | <0.05 |
| C14750 | alpha-Zearalenol                       | 1.31 | ↑ | <0.05 |
| C05484 | Pregnanediol                           | 1.59 | ↑ | <0.05 |
| C06429 | Docosahexaenoic acid                   | 1.46 | ↑ | <0.05 |

|        |                               |      |   |       |
|--------|-------------------------------|------|---|-------|
| C02105 | (S)-Reticuline                | 1.29 | ↑ | <0.05 |
| C06176 | Senecionine                   | 1.38 | ↑ | <0.05 |
| C08316 | Erucic acid                   | 1.01 | ↑ | <0.05 |
| C00942 | Cyclic GMP                    | 1.61 | ↑ | <0.05 |
| C00362 | dGMP                          | 1.36 | ↑ | <0.05 |
| C14151 | Delta-Tocopherol              | 1.55 | ↑ | <0.05 |
| C11962 | 5-Oxoavermectin "1b" aglycone | 1.24 | ↑ | <0.05 |
| C05332 | Phenylethylamine              | 1.65 | ↓ | <0.05 |
| C00181 | D-Xylose                      | 1.83 | ↓ | <0.05 |
| C00624 | N-Acetylglutamic acid         | 1.29 | ↓ | <0.05 |
| C02678 | Dodecanedioic acid            | 1.64 | ↓ | <0.05 |
| C16537 | Pentadecanoic acid            | 1.73 | ↓ | <0.05 |
| C07635 | Epiandrosterone               | 1.75 | ↓ | <0.05 |
| C07461 | Chlorothiazide                | 1.17 | ↓ | <0.05 |
| C16527 | Adrenic acid                  | 1.56 | ↓ | <0.05 |
| C16417 | Xanthohumol                   | 1.72 | ↓ | <0.05 |

---

VIP: variable importance for the projection; ↑, up-regulation; ↓, down-regulation.
